# Supplementary material for: Identification of additional regulatory RNPs that impact rRNA and U6 snRNA methylation
Source: PubMed Central journal article supplement (PMC6124571; doi:10.1242/bio.036095), 2018-07-23
Supplement: biolopen-7-036095-s1.pdf [file biolopen-7-036095-s1.pdf]

**Table S1. Methylation frequency from various studies for the sites investigated in this work.**

|                    | Sharma et al 2017<br>HCT116<br>p53+/+ | Sharma et al 2017<br>HCT116<br>p53-/- | Krogh et al 2016<br>HCT116 | Krogh et al 2016<br>HeLa | Incarnato et al 2016<br>HeLa S3 |
|--------------------|---------------------------------------|---------------------------------------|----------------------------|--------------------------|---------------------------------|
| <b>18S - U428</b>  | 0.8                                   | 0.72                                  | 0.85                       | 0.88                     | not reported                    |
| <b>18S - A484</b>  | 0.73                                  | 0.62                                  | 0.98                       | 0.98                     | 0.76 *                          |
| <b>28S - A2388</b> | 0.69                                  | 0.54                                  | 0.83                       | 0.71                     | not reported                    |
| <b>28S - G3923</b> | 0.7                                   | 0.57                                  | 0.8                        | 0.88                     | 0.003*                          |

\* Methylation expressed as 2OMe Ratio

**Table S2. Abundance levels (expressed as percent relative to GAPDH) of selected scaRNAs and snoRNAs.**

| RNA       | % rel to GAPDH |
|-----------|----------------|
| scaRNA2   | 7.3            |
| scaRNA9   | 72             |
| scaRNA17  | 26             |
| scaRNA5   | 2.7            |
| scaRNA10  | 3.2            |
| snord15A  | 276            |
| snord16   | 409            |
| snord45A  | 814            |
| snord68   | 431            |
| snord94   | 113            |
| snord100  | 382            |
| snord111A | 28             |
| snord111B | 124            |
| snora43   | 793            |
| snora70A  | 89             |
